# **Generation, characterization and drug sensitivities of twelve patient-derived IDH1 mutant glioma cell cultures**

## **Authors**

Cassandra Verheul<sup>1</sup>; Ioannis Ntafoulis<sup>1</sup>, Trisha V. Kers<sup>1</sup>; Youri Hoogstrate<sup>2</sup>; Pier G. Mastroberardino<sup>3</sup>; Sander Barnhoorn<sup>3</sup>; César Payán-Gómez<sup>4</sup>; Romain Tching Chi Yen<sup>5,6</sup>; Eduard A. Struys<sup>7</sup>; Stijn L.W. Koolen<sup>8,9</sup>, Clemens M.F. Dirven<sup>1</sup>; Sieger Leenstra<sup>1</sup>; Pim J. French<sup>2\*</sup>, Martine L.M. Lamfers<sup>1\*#</sup>

## **Affiliations**

<sup>1</sup>Department of Neurosurgery, Brain Tumor Center, Erasmus MC Cancer Institute, Erasmus University Medical Center, Rotterdam, Zuid-Holland, 3015 GN, The Netherlands.

<sup>2</sup>Department of Neurology, Brain Tumor Center, Erasmus MC Cancer Institute, Erasmus University Medical Center, Rotterdam, Zuid-Holland, 3015 GN, The Netherlands.

<sup>3</sup>Department of Molecular Genetics, Erasmus University Medical Center, Rotterdam, Zuid-Holland, 3015 GN, The Netherlands.

<sup>4</sup>Department of Biology, Faculty of Natural Sciences, Universidad del Rosario, Bogotá, Colombia.

<sup>5</sup>Information Technologies for Translational Medicine (ITTM), Esch-Sur-Alzette, 4362, Luxembourg (RTCY)

<sup>6</sup>Luxembourg Centre for Systems Biomedicine (LCSB), University of Luxembourg, Esch-Sur-Alzette, 4367, Luxembourg (RTCY)

<sup>7</sup>Metabolic Unit, Department of Clinical Chemistry, Amsterdam University Medical Center, Noord-Holland, 1081 HV, The Netherlands.

<sup>8</sup>Department of Medical Oncology, Erasmus MC Cancer Institute, Erasmus University Medical Center, Rotterdam, Zuid-Holland, 3015 GN, The Netherlands

<sup>9</sup>Department of Hospital Pharmacy, Erasmus University Medical Center, Rotterdam, Zuid-Holland, 3015 GN, The Netherlands

## Author footnotes

\*Both authors contributed equally to this manuscript

# Correspondence: [m.lamfers@erasmusmc.nl](mailto:m.lamfers@erasmusmc.nl), Wytemaweg 80, Ee2236, 3015 CN Rotterdam

Tel: +31 10 703 5993

## Authorship

Conceptualization: C.V., M.L.M.L. and P.J.F.; Methodology: C.V.; M.L.M.L., P.J.F.; Software: Y.H.; R.T.C.Y.; Formal analysis: Y.H., C.V., P.J.F., R.T.C.Y., C.P.G.; Investigation: C.V., I.N., T.V.K., S.B., E.A.S.; Resources: P.G.M., E.A.S.; Writing – Original Draft: C.V., I.N., M.L.M.L.; Writing – Review and editing: M.L.M., P.J.F., P.G.M., C.P.G., C.M.F.D., S.L.W.K., S.L.; Visualization: C.V.; Supervision: M.L.M.L., P.J.F., S.L.; Funding acquisition: M.L.M.L. and P.J.F.

## Conflict of Interest

The authors declare no competing interest.

## Funding

Stichting STOPHersentumoren (to M.L.M.L.); Strijd van Salland (to P.F); European Union's Horizon 2020 Research and Innovation programme under the Marie Skłodowska-Curie (No 766069 to S.L and M.L.M.L), Erasmus Foundation-Brain Tumor Survival Marathon (to M.L.M.L.).

## **Manuscript word count**

Abstract: 249

Text (abstract/keypoints/importance/background/results/discussion/acknowledgements): 4140

References: 1198

Figure legends: 733

## Abstract

**Background:** Mutations of the isocitrate dehydrogenase (*IDH*) gene occur in over 80% of low-grade gliomas and secondary glioblastomas. Despite considerable efforts, endogenous *in vitro* *IDH*-mutated glioma models remain scarce. Availability of these models is key for the development of new therapeutic interventions.

**Methods:** Cell cultures were established from fresh tumor material and expanded in serum-free culture media. D-2-Hydroxyglutarate levels were determined by mass-spectrometry. Genomic and transcriptomic profiling were carried out on the Illumina Novaseq platform, methylation profiling was performed with the Infinium MethylationEpic BeadChip array. Mitochondrial respiration was measured with the Seahorse XF24 Analyzer. Drug screens were performed with an NIH FDA-approved anti-cancer drug set and two *IDH*-mutant specific inhibitors.

**Results:** A set of twelve patient-derived *IDHmt* cell cultures were established. We confirmed high concordance in driver mutations, copy number and methylation profiles between the tumors and derived cultures. Homozygous deletion of *CDKN2A/B* was observed in all cultures. *IDH*-mutant cultures had lower mitochondrial reserve capacity. *IDH*-mutant specific inhibitors did not affect cell viability or global gene expression. Screening of 107 FDA-approved anti-cancer drugs identified nine compounds with potent activity against *IDHmt* gliomas, including three compounds with favorable pharmacokinetic characteristics for CNS penetration: teniposide, omacetaxine mepesuccinate, and marizomib.

**Conclusions:** Our twelve *IDH*-mutant cell cultures show high similarity to the parental tissues and offer a unique tool to study the biology and drug sensitivities of high-grade *IDHmt* gliomas *in vitro*. Our drug screening studies reveal lack of sensitivity to *IDHmt* inhibitors, but sensitivity to a set of nine available anti-cancer agents.

## Keywords

Glioma, pre-clinical models, IDH1, drug repurposing, patient-derived cell culture

## Key points

1. IDHmt glioma cultures closely resemble their parental tumors
2. Microscopic monitoring of early passages and colony isolation increases IDH1mt culture success
3. Drug screening identified nine candidate repurposed drugs for IDHmt glioma

## Importance of the study

IDH-mutations are highly prevalent in low grade and secondary high-grade gliomas. Despite this high frequency however, very few *in vitro* models have been reported for IDH-mutated gliomas. In this manuscript we describe and characterize in detail twelve primary cultures from IDH-mutant astrocytomas. We show that these cultures retain most of the genetic, epigenetic and metabolic features of their respective parental tumors. Because of these similarities, these independent model systems will not only help understand the molecular defects driven by the mutation, but are also vital to identify means to target these tumors. Screening of 107 FDA-approved anti-cancer agents on these cultures identified a set of highly effective agents that may offer candidates for either systemic or assisted delivery treatment of this tumor subtype.

# Background

*IDH* mutations are present in approximately 80% of low-grade glioma (grade II and III) and secondary glioblastomas.<sup>1</sup> *IDH* mutations result in a neomorphic gain-of-function of the mutant enzyme, which causes it to convert alpha ketoglutarate ( $\alpha$ -KG) to D-2-hydroxyglutarate (D-2-HG). D-2-HG is a competitive inhibitor of several  $\alpha$ -KG dependent enzymes including the histone lysine demethylase JMJD2 and the methylcytosine dioxygenase TET2, which results in the global hypermethylated (G-CIMP, glioma CpG island methylator phenotype) state of IDH-mutant gliomas.<sup>2</sup>

The discovery of this somatic mutation in malignant glioma instigated the development of agents targeting *IDH*-mutant tumors.<sup>3,4</sup> Unfortunately, pre-clinical research has been hampered by lack of IDHmt glioma model systems as tumor samples from IDH-mutated glioma patients are notoriously difficult to culture.<sup>5,6</sup> Worldwide, only a few endogenous IDH-mutant cell lines have been described thus far.<sup>7-11</sup>

Over the last ten years, our lab has attempted to establish cell cultures from over 275 low-grade and secondary gliomas resected in our clinic. Our continuous effort resulted in 12 cultures from IDH-mutant 1p19q non-codeleted astrocytomas, which is the largest set of patient-derived IDHmt cell cultures described to date. We show that these cell cultures retain the morphological, genetic, epigenetic, metabolic and transcriptomic features of the primary tumor. Current developments in the neuro-oncology field directed toward improving drug delivery to CNS tumors have reignited interest in anti-cancer agents that are already available. We therefore applied our IDHmt cell cultures to screen 107 FDA-approved anti-cancer agents to identify potential candidates for either systemic or enhanced delivery applications.

# Methods

## *Tumor processing and cell culture*

Fresh glioma tissue samples were obtained directly from the operating room of the Erasmus Medical Center or the Elizabeth Tweesteden Hospital, the Netherlands. The use of patient tissue for this study was approved by the local ethics committees of these hospitals and all patients signed informed consent forms according to the guidelines of the Institutional Review Boards of the respective hospitals.

Samples were processed essentially according to a further optimized protocol based on Balvers et al (see also supplemental methods).<sup>5</sup> After 5-8 days, cultures were transferred to a new flask coated with 1:100 Cultrex PathClear RGF-BME (R&D Systems) for adherent expansion. Cell cultures were considered successful if they could be passaged at least five times while retaining their *IDH1* mutation.

Growth rates and doubling times were assessed by seeding  $2 \times 10^5$  cells in a pre-coated T75 flasks (+/- 10  $\mu$ M AGI-5198, Agios), which were counted and split at ~90% confluency for at least three passages.

## *Sequencing*

Genomic DNA was extracted from cell pellets (passages ranging from 0-12), cryosections of snap frozen tumor material or leukocytes using the DNeasy Blood & Tissue Kit (Qiagen).

All RNA was extracted from pellets of cultured cells (passage numbers ranging from 8-14) and cryosections of snap frozen tumor material with the RNeasy Plus Mini Kit (Qiagen).

Presence of IDH1 mutations was confirmed by Sanger sequencing using 5'-GTG GCA CGG TCT TCA GAG A-3' and 5'- TTC ATA CCT TGC TTA ATG GGT GT- 3' primers.

Five hundred ng genomic DNA was fragmented to ~300 bp with the Kapa Hyperplus Library prep kit. The exome captured by the SeqCap wash kit and SeqCap pure capture bead kit (both from Roche). The Illumina Novaseq platform was used to sequence 150 bases (paired-end sequencing) to obtain 6GB per sample.

Driver mutations were derived from.<sup>12</sup> CopyNumbers were calculated using the CNVKit package.<sup>13</sup>

RNA was isolated from cell cultures (+/- 5  $\mu$ M AGI-5198) using the RNeasy kit (Qiagen). We performed paired-end sequencing of 2x100 with the Illumina Novaseq platform to obtain 8-10 GB per sample. For details on sequencing, data processing and analysis, see supplemental methods.

DNA methylation levels was assessed using the Infinium methylationEPIC beadchip arrays (Illumina) according to standard protocols and classified as described<sup>14</sup> or using the TCGAbiolinks Bioconductor package. Further analysis as done using the Bioconductor *Minfi* package.<sup>15</sup>

#### *Mitochondrial oxidative respiration assay*

We measured cellular oxidative respiration with the Seahorse XF24 Analyzer as described previously.<sup>16</sup> Cell cultures were seeded in ten-plo at a density of 40,000 cells per well and grown overnight in standard culture medium. One hour before the start of the experiment we replaced culture medium with XF Assay Medium (Agilent Technologies) pH7.4, supplemented with 10 mM glucose, 2 mM glutamin and 1 mM sodium pyruvate and incubated at 37°C without CO<sub>2</sub>. After baseline measurements, cellular response after sequential injections of 1  $\mu$ M oligomycin, 0.5  $\mu$ M FCCP, and 1  $\mu$ M antimycin were measured. Basal respiration, mitochondrial ATP production, proton leakage, and maximal respiration rates were calculated with Seahorse Wave software.

#### *D/L-2-hydroxyglutarate measurements*

Intracellular D-2-HG and L-2-HG was measured in cell pellets after five days of culture as described.<sup>17</sup>

#### *Drug screening*



Drug screening was done using IDH inhibitors AGI-5198 (Agiros) or BAY-1436032 (Bayer) or the FDA-approved Oncology Drug Set II library (National Cancer Institute). Viability was assessed by the CellTiter GLO 2.0. For details see supplemental methods.

### *Gene expression analysis*

Differential gene expression analysis and normalization was performed with DESeq2 and further visualizations of expression profiles used the DESeq2 VST transformed read counts<sup>18</sup>. only genes with  $\geq 4$  read counts across the tested samples were included.

Principal component analysis was performed on the top 500 genes with the highest variance. We performed cluster analysis based on the 1000 most variably expressed genes using the pheatmap package in R, and scaled by row.

Pathway analysis was done using the DAVID Bioinformatics Resources 6.8 (Huang DW, Sherman BT, Lempicki RA. Systematic and integrative analysis of large gene lists using DAVID Bioinformatics Resources. Nature Protoc. 2009;4(1):44-57) using a false discovery rate (FDR) of 0.05 as cut-off and using Gene Set Enrichment Analysis (GSEA) using an FDR < 0.25.<sup>19</sup> Statistical significance of pathway enrichment scores was ascertained by permutation testing with matched random gene sets.

### *Statistical analysis*

The unpaired Student's T-test was used for the comparison of two groups (statistical significance was defined as  $p < 0.05$ ). To determine significance of contingency tables we used the Fisher exact test (statistical significance was defined as  $P < 0.05$ ). The IC50 values were calculated by applying a Nonlinear regression (curve-fit) and selecting the dose-response inhibition equation in Graphpad Prism.

## Results

### Establishment of successful IDHmt cell cultures

Glioma resection material of over 275 low-grade or secondary high-grade gliomas were transported to our lab to establish patient-derived cell cultures. We sequenced all successful cultures ( $N=80$ ) for *IDH* mutations and identified twelve cell cultures derived from eleven patients that retained their IDH-R132H mutation. Nine cultures were derived from secondary glioblastomas, one from a grade III anaplastic astrocytoma and two from grade II astrocytomas. All cultures were derived from 1p/19q non-codeleted gliomas. Patient and cell line characteristics are listed in Table S1.

Doubling time of IDHmt cultures (mean 3.8 days; range 1.8-7.5) was significantly greater than of IDHwt glioblastoma cultures (mean 2.6 days; range 1.6-3.6,  $p<0.05$ ) (Fig. S1A). We passaged GS.0580 to passage 50 without any notable changes in growth rate or morphology and verified the continued presence of the *IDH1* mutation. We determined intracellular levels of the enantiomers D-2-HG and L-2-HG in eight IDHmt and four IDHwt cell cultures. All IDHmt cell cultures revealed dramatically increased levels of D-2-HG over L-2-HG (mean value 864; range 53-2251) compared to those of IDHwt cell cultures (mean value 1.6; range 0.3-5.2), indicating presence of mutant IDH enzyme activity (Fig. S1B).

### IDHmt cultures resemble parental tumors on genomic level

We performed whole exome sequencing on seven IDHmt cultures and their parental tumors to determine whether they retained the classical features of IDHmt astrocytic gliomas. Apart from the *IDH1* mutation, *TP53* was most frequently mutated in the cell cultures ( $N=7$ ), followed by *ATRX* (Fig. 1A). Both driver mutations were retained in cell cultures if they were present in parental tumors.

Interestingly, mutations in *NOTCH1* and *GABRA1* were not identified in one primary tumor sample, while they were found in the primary cell culture (GS.0588b). At tumor recurrence, however, both mutations were present in the tumor and cell culture, which indicates subclonal expansion of mutations already detectable in our primary cell culture. Furthermore, in copy number analysis we found a striking homozygous loss of the *CDKN2A/B* locus in all IDHmt cell cultures, whereas this loss was detected in only eight out of twelve IDHmt tumors (Fig. 1B, Fig. S2A-L). When compared to the glioblastomas present in the TCGA database, *CDKN2A/B* loss in combination with *IDH1/2* mutations was significantly more common in our cell cultures (12/12 compared to 6/15,  $p=0.001$ ). We did not note such specific copy number changes when we compared IDHwt glioma cultures to their parental tumors.

Overall, copy number analysis shows similarity of copy number alterations between the tumor tissues and corresponding cell cultures for both IDHmt and IDHwt cultures (Fig. S2).

## 2D culture morphology reveals IDH status

In early passages of the IDHmt cell cultures often two types of cells were visible: round-bodied cells with thin protrusions and light edges (astrocytic phenotype) and dark, large flat cells (fibroblast-like phenotype). We hypothesized that IDHmt glioma cells would be of the astrocytic phenotype. We separated morphologically different colonies from low-passage ( $\leq 1$ ) cell cultures. Colony isolation and expansion from a mixed population of GS.0771 cells, yielded two distinct cell cultures: the original culture GS.0771a that evolved to almost exclusively contain fibroblast-like cells, and an astrocytoma-like culture GS.0771b (Fig. 1D). Sanger sequencing revealed that only GS.0771b maintained its IDH mutation and copy numbers of the parental tumor; GS.0771a did not retain the IDH mutation (data not shown) and the copy number plot showed a diploid genome (Fig S3 A-C). Mutations in *TP53* and *ATRX* from the parental tumor were preserved in GS.0771b but not GS.0771a (Fig 1E). Similarly, clone separation of GS.0588, also showed retention of *IDH1* and *TP53* mutations in the astrocytic GS.0588b culture but not

in the fibroblast-like GS0588a culture. All successful cultures with verified IDH mutations had astrocytoma-like morphologies, although some degree of heterogeneity between cultures was observed (Fig. S4). Astrocytoma-like morphological features therefore can be used as pre-selection for establishing IDHmt cell cultures.

### **Global methylation profiles are retained in IDHmt glioma cultures**

To determine whether the epigenetic profiles of our cultures were retained, we assessed the DNA methylation class of twelve IDHmt and 5 IDHwt cell cultures and their parental tumors. In a publicly available classifier that can predict all CNS tumor types, all cell cultures were classified as gliomas and received the same overall class as their parental tumors with a classifier score above the cutoff of 0.9, except for glioma cell culture GS.0811 which received a score of 0.74<sup>14</sup>. All IDHmt tumors were classified as IDHmt with subclass either A\_IDH (astrocytoma, IDH mutant, n=4) or A\_IDH\_HG (astrocytoma, IDHmt high grade, n=8) (Fig. 2A). Interestingly, all IDHmt cultures were assigned to methylation subclass A\_IDH\_HG which points towards tumor progression in culture or to selection of more aggressive subclones.

TCGA-based classification of G-CIMP methylation profiles of our samples classified nine tumors as G-CIMP-high, while the remaining three gliomas were classified as G-CIMP-low (Fig. 2B).<sup>20</sup> One of the G-CIMP-high tumors was G-CIMP-low in its corresponding cell culture, another switched to the oligodendroglioma subclass. Of the five IDHwt cultures all but one retained the G-CIMP classification.

Unsupervised clustering of the 1000 most variably methylated CpG sites separated IDHwt tumors and cell cultures from IDHmt tumors and cell cultures (Fig. 2C), with IDHwt samples revealing lower overall methylation intensity. All IDHwt cultures cluster closest to their respective parental tumor sample. IDHmt tumor tissue samples tend to cluster together rather than with their matched cell culture; only four out of twelve IDHmt sample sets group together. Indeed, the primary (GS.0588b) and recurrent

(GS.0871) tumor tissue samples derived from the same patient, cluster together, as do the derived cell cultures. This indicates longitudinal preservation of methylation profiles, both *in vitro* and *in situ*.

### **Gene expression shows correlation between tumor and cell cultures**

We performed RNA sequencing to evaluate the changes in expression profiles between tumor tissue and cell cultures. A PCA plot shows a very clear separation between tumor tissues and cell cultures in the first dimension (Fig. 3A). The second dimension separates IDHwt samples from IDHmt samples.

We correlated the log2 fold changes of IDHmt versus IDHwt tumor tissue with the log2 fold changes of IDHmt versus IDHwt cultures (adjusted p-value < 0.05, log2 [fold change]  $\geq$  0.58 for upregulated genes or  $\leq$  -0.58 for downregulated genes) (Fig. 3B). There is an overall correlation, with a total of 161 genes significantly differentially expressed in both IDHmt tumor tissue and IDHmt cell cultures compared to their wild type counterparts. Gene ontology enrichment analysis identified upregulated differentially expressed genes involved in transcription, synaptic transmission and neural migration, and downregulated genes associated with response to virus infection (Fig 3C).

### **The IDH mutation suppresses bioenergetic metabolism in cultured glioma**

Oncometabolite D-2-HG has a myriad of effects on epigenetics and metabolism.<sup>21</sup> Mitochondrial respiration was assessed by measuring extracellular oxygen consumption rate (OCR) and glycolysis through the acidification rate (ECAR), in six IDHmt and seven IDHwt cultures. Although basal OCR did not differ between IDHwt and IDHmt glioma cultures, mitochondrial reserve respiratory capacity was significantly reduced in IDH mutants (Fig. 4A). Moreover, mutant cells also displayed reduced ECAR, in both basal conditions and after inhibition of mitochondrial ATP synthase (adjusted P value < 0.05) (Fig. 4B). Canonical pathway analysis (KEGG) of RNA expression data, comparing IDHmt cell cultures with IDHwt cultures revealed that IDHmt cultures have downregulation of glycolysis and of other processes

crucially involved in bioenergetics, such as pyruvate metabolism, the citric acid cycle, and nicotinate and nicotinamide metabolism, which all contribute to respiration substrates production (Table S2). Conversely, no differences were observed in the expression of genes of the electron transport chain complexes. Overall, evidence at transcription level is consistent with biochemical analyses showing reduced bioenergetic function in mutants and we conclude that IDHmt cell cultures have an intact electron transport chain but lower metabolite supply.

### **IDH mutant-specific inhibitors affect enzyme activity but not growth rate of IDHmt cells**

Addition of IDH mutant-specific inhibitor AGI-5198 to the culture medium for seven days resulted in a dose-dependent decrease of D-2-HG levels in all IDHmt cell cultures (Fig. 5A). A concentration of 2.5  $\mu$ M AGI-5198 was sufficient to reduce the D2HG levels with over 99%. The D2-HG levels of the two IDHwt cultures were below the detection limit. Despite this strong D-2-HG reduction, we did not observe any effect on cell viability. Similar results were obtained using an alternative inhibitor (Bay-1436032) (Fig. 5B). For both inhibitors, doses over 10  $\mu$ M resulted in a decrease in cell viability, but this effect was also observed in IDHwt cultures, indicating more general toxicity. We also examined the effect on doubling times over three consecutive passages (Fig. 5C). Only IDHmt cell culture GS.0661 showed a significantly extended doubling time ( $p=0.02$ ) in the presence of the 10  $\mu$ M inhibitor, from 3.2 days for controls to 5.2 days in the presence of AGI-5198. These data suggest that the IDHmt cultures are not dependent on high D2-HG levels for viability or growth, at least not for the time spans investigated.

To address the effect of D2-HG on RNA expression, eight IDHmt and four IDHwt cultures were treated for seven days with the IDH mutant-specific inhibitor AGI-5198. Treatment with AGI-5198 does not result in a distinct expression signature and clustering analysis showed that treated and untreated cell culture counterparts remain nearest neighbors in all cases (Fig. 5D). In IDHmt glioma cultures, upon AGI-

5198-treatment seven genes were significantly downregulated, and 17 upregulated (FDR < 0.00001, log2 [fold change]  $\geq 1$  or  $\leq -1$ ).

### **Drug screening of 107 approved anti-cancer agents on IDHmt cell cultures**

were screened the first available seven IDHmt glioma cultures for sensitivity to 107 FDA-approved oncology drugs. As an initial cut-off, we defined cultures as sensitive where IC<sub>50</sub> values of the compounds were below reported C<sub>max</sub> plasma values in patients.<sup>22</sup> Nineteen compounds were identified that were effective in at least six of seven cultures (Fig. 6A). These compounds were grouped into nine drug subclasses and ranked within each class according to the CNS multi-parameter optimization (MPO) score, which predicts blood brain barrier (BBB) crossing based physicochemical properties (Table S3).<sup>23</sup> However, compounds with low MPO score were still considered as possible candidates if enhanced or local delivery systems are in development for these drugs. Based on these data, we selected one compound from each subclass for further validation: gemcitabine, teniposide, daunorubicin, romidepsin, dactinomycin, regorafenib, and omacetaxine. We replaced the proteasome inhibitor bortezomib by marizomib, which has a similar mechanism of action and is currently under investigation in clinical GBM trials<sup>24,25</sup>. For the taxanes we opted to include paclitaxel, as this compound is currently under investigation using focused ultrasound delivery (Table S3).<sup>26</sup>

Using smaller-stepped dilution series, IC50 values of these drugs were determined on all twelve IDHmt cultures. This validation set revealed high overall sensitivity to each of the compounds (Fig. 6B), although a degree of intertumoral variability was observed. Notably, low-grade glioma culture GS.0962 showed most resistance to therapy. Mean IC50 values remained well-below reported plasma C<sub>max</sub> values for most of the compounds, in particular for romidepsin and dactinomycin (Fig. 6C). These results present a set of available anti-cancer compounds that are effective against IDHmt glioma cells and which

are either expected to cross the BBB, such as omacetaxin mepesuccinate and marizomib, or which are being developed for local or enhanced delivery, such as paclitaxel.



## Discussion

In this study, we present a panel of twelve cell cultures derived from 1p19q non-codeleted astrocytic tumors and an in-depth characterization of these cultures. Previously, we reported that EGF/FGF supplemented serum-free culture conditions do not support growth of IDHmt tumors.<sup>5</sup> However, with adapted tumor dissociation and culture protocols, combined with careful monitoring of morphological features of the cells and in some cases isolation of astrocytic subpopulations, we demonstrate that such cultures can be established and maintained for a prolonged period of time. We identified morphological features that are an indicator of the stem-like nature of IDHmt glioma cells in 2D cell culture with brightfield microscopy, namely elongated cells with small cell bodies, thin protrusions and bright edges. Cell cultures with this astrocytic morphology maintained their IDH mutation in culture in all cases.

Homozygous loss of *CDKN2A/B* is a relatively common occurrence in gliomas and a predictor of poorer patient survival in IDHmt astrocytomas.<sup>27</sup> Interestingly, without exception, we observed loss of *CDKN2A/B* in all IDHmt glioma cultures, whereas this was detected in only eight of the twelve the parental tumors. Loss of *CDKN2A/B* thus appears to be a prerequisite for successful culture establishment of IDHmt gliomas in our culture conditions. *CDKN2A/B* loss points towards a more aggressive phenotype and our cultures should therefore be considered as a representation of more advanced stages of astrocytomas, even when derived from low grade tumors.

Global methylation profiling is rapidly gaining momentum in the classification of central nervous system tumors.<sup>14</sup> Using this classifier, all IDHmt astrocytoma cell cultures were assigned to high-grade astrocytomas (A\_IDH\_HG), which, on the genomic level, is in agreement with homozygous deletion of the *CDKN2A/B* locus. In a classifier as defined by the TCGA, such large differences were not identified and most cultures remained G-CIMP-high).

The functions of IDH mutations in metabolism are an important research focus, from a mechanistic point of view as well as to identify metabolic vulnerabilities that can be targeted for therapy.<sup>18,28</sup> We

measured mitochondrial respiration and glycolysis rate in our set of IDHmt cultures and correlated these parameters with gene expression data. This revealed that IDHmt glioma cultures have compromised bioenergetics and reduced mitochondrial reserve capacity, however, the electron transport chain remains unperturbed, suggesting that IDHmt cultures may have a lower metabolite supply. This is consistent with other reports that show reduced glycolysis in IDHmt patient and PDX tumors. Alternative carbon sources (such as glutamate, acetate and lactate) may supplement the bioenergetic fuel in IDHmt gliomas.<sup>9,29,30</sup> The availability of cell cultures with endogenous IDH mutation allows for further studies into these processes.

IDH mutations are early events in gliomagenesis which usually remain clonal as the tumor progresses.<sup>31-</sup>  
<sup>33</sup> Occasional loss of mutant IDH in recurrent gliomas has been reported, suggesting that the presence of the mutation is not essential for tumor survival or tumor progression.<sup>34</sup> Indeed, inhibition of the mutant enzyme and D2HG production did not decrease short-term viability, and only one cell culture showed a small decrease in growth rate when exposed for several passages. This contrasts with previous research that reports decreased growth rates *in vitro* and in xenografted mouse models.<sup>35,36</sup> The source of this discrepancy may lie in the advanced grade of our cell cultures. If so, this may have important clinical implications as it suggests that patients with newly diagnosed low grade glioma rather than secondary glioblastoma may be a better candidate for the use of IDH mutant-specific inhibitors. Alternatively, longer exposure to the inhibitor is required or effects of the inhibitor on the *in situ* tumor microenvironment play a role in its anti-glioma activity.

Drug screening of 107 FDA-approved anti-cancer compounds identified 19 compounds that showed effective killing at IC<sub>50</sub> values well-below C<sub>max</sub> plasma values. Although plasma C<sub>max</sub> values do not accurately reflect drug concentrations in the tumor due to many factors including protein-binding, BBB penetration and the activity of drug efflux pumps, we used this value to discriminate between potentially effective compounds and those which are unlikely to reach effective concentrations in the

brain. Interestingly, a number of the identified compounds have also been identified in previous *in vitro* compound screens on smaller sets of glial tumors.<sup>37-41</sup> Several of the compounds identified in our screen have also been tested in clinical trials for glioma in the past (see table S3), but none of the compounds were tested specifically in IDH-mutant patients. The current developments in local or enhanced CNS delivery methods opens up new treatment possibilities for highly potent compounds that do not have favorable characteristics to pass the BBB, such as romidepsin and dactinomycin.<sup>42,43</sup> Of particular interest are the compounds teniposide, omacetaxine, and marizomib, which are reported to cross the BBB and may offer candidates for systemic delivery<sup>44-46</sup>.

In conclusion, we established a set of twelve patient-derived IDHmt glioma cell cultures from an astrocytoma background and different WHO grades. Based on the genetic, epigenetic, transcriptomic and metabolic similarity with the parental tumor, our IDHmt glioma cultures offer a versatile model system to test new therapeutic strategies and to advance research on this important subset of gliomas.

## Acknowledgements

We thank all patients for contributing to this research and the neurosurgeons involved for providing the tissue, Alicia van der Ploeg, Judith van der Burg and Stanley Van for their contribution to data acquisition, and the NIH/NCI Developmental Therapeutics Program (<http://dtp.cancer.gov>) for providing the Oncology Drug Set.

## References

1. Network CGAR. Comprehensive, Integrative Genomic Analysis of Diffuse Lower-Grade Gliomas. *New England Journal of Medicine*. 2015; 372(26):2481-2498.
2. Turcan S, Rohle D, Goenka A, et al. IDH1 mutation is sufficient to establish the glioma hypermethylator phenotype. *Nature*. 2012; 483(7390):479-483.
3. Golub D, Iyengar N, Dogra S, et al. Mutant Isocitrate Dehydrogenase Inhibitors as Targeted Cancer Therapeutics. *Front Oncol*. 2019; 9:417.
4. Mellinghoff IK, Cloughesy TF, Wen PY, et al. A phase I, open label, perioperative study of AG-120 and AG-881 in recurrent IDH1 mutant, low-grade glioma: Results from cohort 1. *Journal of Clinical Oncology*. 2019; 37(15\_suppl):2003-2003.
5. Balvers RK, Kleijn A, Kloezeman JJ, et al. Serum-free culture success of glial tumors is related to specific molecular profiles and expression of extracellular matrix-associated gene modules. *Neuro Oncol*. 2013; 15(12):1684-1695.
6. Lee J, Kotliarova S, Kotliarov Y, et al. Tumor stem cells derived from glioblastomas cultured in bFGF and EGF more closely mirror the phenotype and genotype of primary tumors than do serum-cultured cell lines. *Cancer Cell*. 2006; 9(5):391-403.
7. Luchman HA, Stechishin OD, Dang NH, et al. An in vivo patient-derived model of endogenous IDH1-mutant glioma. *Neuro-Oncology*. 2012; 14(2):184-191.
8. Laks DR, Crisman TJ, Shih MYS, et al. Large-scale assessment of the gliomasphere model system. *Neuro-Oncology*. 2016; 18(10):1367-1378.
9. Garrett M, Sperry J, Braas D, et al. Metabolic characterization of isocitrate dehydrogenase (IDH) mutant and IDH wildtype gliomaspheres uncovers cell type-specific vulnerabilities. *Cancer Metab*. 2018; 6:4.
10. Kelly JJ, Blough MD, Stechishin OD, et al. Oligodendroglioma cell lines containing t(1;19)(q10;p10). *Neuro Oncol*. 2010; 12(7):745-755.
11. Jones LE, Hilz S, Grimmer MR, et al. Patient-derived cells from recurrent tumors that model the evolution of IDH-mutant glioma. *Neuro-Oncology Advances*. 2020.
12. Brennan CW, Verhaak RG, McKenna A, et al. The somatic genomic landscape of glioblastoma. *Cell*. 2013; 155(2):462-477.
13. Talevich E, Shain AH, Botton T, Bastian BC. CNVkit: Genome-Wide Copy Number Detection and Visualization from Targeted DNA Sequencing. *PLOS Computational Biology*. 2016; 12(4):e1004873.
14. Capper D, Jones DTW, Sill M, et al. DNA methylation-based classification of central nervous system tumours. *Nature*. 2018; 555(7697):469-474.
15. Aryee MJ, Jaffe AE, Corrada-Bravo H, et al. Minfi: a flexible and comprehensive Bioconductor package for the analysis of Infinium DNA methylation microarrays. *Bioinformatics*. 2014; 30(10):1363-1369.
16. Milanese C, Payán-Gómez C, Galvani M, et al. Peripheral mitochondrial function correlates with clinical severity in idiopathic Parkinson's disease. *Movement Disorders*. 2019; 34(8):1192-1202.
17. Struys EA. Measurement of Urinary D- and L-2-Hydroxyglutarate Enantiomers by Stable-Isotope-Dilution Liquid Chromatography-Tandem Mass Spectrometry after Derivatization with Diacetyl-L-Tartaric Anhydride. *Clinical Chemistry*. 2004; 50(8):1391-1395.
18. Tateishi K, Wakimoto H, Iafate AJ, et al. Extreme Vulnerability of IDH1 Mutant Cancers to NAD<sup>+</sup> Depletion. *Cancer Cell*. 2015; 28(6):773-784.
19. Subramanian A, Tamayo P, Mootha VK, et al. Gene set enrichment analysis: A knowledge-based approach for interpreting genome-wide expression profiles. *Proceedings of the National Academy of Sciences*. 2005; 102(43):15545-15550.

20. Ceccarelli M, Floris, Tathiane, et al. Molecular Profiling Reveals Biologically Discrete Subsets and Pathways of Progression in Diffuse Glioma. *Cell*. 2016; 164(3):550-563.
21. Parker SJ, Metallo CM. Metabolic consequences of oncogenic IDH mutations. *Pharmacology & Therapeutics*. 2015; 152:54-62.
22. Liston DR, Davis M. Clinically Relevant Concentrations of Anticancer Drugs: A Guide for Nonclinical Studies. *Clinical Cancer Research*. 2017; 23(14):3489-3498.
23. Wager TT, Hou X, Verhoest PR, Villalobos A. Moving beyond Rules: The Development of a Central Nervous System Multiparameter Optimization (CNS MPO) Approach To Enable Alignment of Druglike Properties. *ACS Chemical Neuroscience*. 2010; 1(6):435-449.
24. NCT03345095 Cg. A Phase III Trial of With Marizomib in Patients With Newly Diagnosed Glioblastoma (MIRAGE). 2017; <https://clinicaltrials.gov/ct2/show/NCT03345095?term=marizomib&cond=glioblastoma&draw=2&rank=1>.
25. Roth P, Reijneveld J, Gorlia T, et al. P14.124 EORTC 1709/CCTG CE.8: A phase III trial of marizomib in combination with standard temozolomide-based radiochemotherapy versus standard temozolomide-based radiochemotherapy alone in patients with newly diagnosed glioblastoma. 2019.
26. NCT04528680. Ultrasound-based Blood-brain Barrier Opening and Albumin-bound Paclitaxel for Recurrent Glioblastoma (SC9/ABX). 2020; <https://clinicaltrials.gov/ct2/show/NCT04528680>. Accessed 22-10-2020, 2020.
27. Appay R, Dehais C, Maurage C-A, et al. CDKN2A homozygous deletion is a strong adverse prognosis factor in diffuse malignant IDH-mutant gliomas. *Neuro-Oncology*. 2019; 21(12):1519-1528.
28. Li S, Chou AP, Chen W, et al. Overexpression of isocitrate dehydrogenase mutant proteins renders glioma cells more sensitive to radiation. *Neuro-Oncology*. 2013; 15(1):57-68.
29. Dekker LJM, Wu S, Jurriëns C, et al. Metabolic changes related to the IDH1 mutation in gliomas preserve TCA-cycle activity: An investigation at the protein level. *The FASEB Journal*. 2020; 34(3):3646-3657.
30. Fack F, Tardito S, Hochart G, et al. Altered metabolic landscape in IDH-mutant gliomas affects phospholipid, energy, and oxidative stress pathways. *EMBO Mol Med*. 2017; 9(12):1681-1695.
31. Watanabe T, Nobusawa S, Kleihues P, Ohgaki H. IDH1 Mutations Are Early Events in the Development of Astrocytomas and Oligodendrogliomas. *The American Journal of Pathology*. 2009; 174(4):1149-1153.
32. Lai A, Kharbanda S, Pope WB, et al. Evidence for Sequenced Molecular Evolution of IDH1 Mutant Glioblastoma From a Distinct Cell of Origin. *Journal of Clinical Oncology*. 2011; 29(34):4482-4490.
33. Johnson BE, Mazar T, Hong C, et al. Mutational Analysis Reveals the Origin and Therapy-Driven Evolution of Recurrent Glioma. *Science*. 2014; 343(6167):189-193.
34. Mazar T, Chesnelong C, Pankov A, et al. Clonal expansion and epigenetic reprogramming following deletion or amplification of mutant IDH1. *Proceedings of the National Academy of Sciences*. 2017; 114(40):10743-10748.
35. Pusch S, Krausert S, Fischer V, et al. Pan-mutant IDH1 inhibitor BAY 1436032 for effective treatment of IDH1 mutant astrocytoma in vivo. *Acta Neuropathologica*. 2017; 133(4):629-644.
36. Rohle D, Popovici-Muller J, Palaskas N, et al. An Inhibitor of Mutant IDH1 Delays Growth and Promotes Differentiation of Glioma Cells. *Science*. 2013; 340(6132):626-630.
37. Donson AM, Amani V, Warner EA, et al. Identification of FDA-Approved Oncology Drugs with Selective Potency in High-Risk Childhood Ependymoma. *Molecular Cancer Therapeutics*. 2018; 17(9):1984-1994.

38. Pollard SM, Yoshikawa K, Clarke ID, et al. Glioma Stem Cell Lines Expanded in Adherent Culture Have Tumor-Specific Phenotypes and Are Suitable for Chemical and Genetic Screens. *Cell Stem Cell*. 2009; 4(6):568-580.
39. Dao Trong P, Jungwirth G, Yu T, et al. Large-Scale Drug Screening in Patient-Derived IDHmut Glioma Stem Cells Identifies Several Efficient Drugs among FDA-Approved Antineoplastic Agents. *Cells*. 2020; 9(6):1389.
40. Jiang P, Mukthavavam R, Chao Y, et al. Novel anti-glioblastoma agents and therapeutic combinations identified from a collection of FDA approved drugs. *Journal of Translational Medicine*. 2014; 12(1):13.
41. Taylor JT, Ellison S, Pande A, et al. Actinomycin D downregulates Sox2 and improves survival in preclinical models of recurrent glioblastoma. *Neuro-Oncology*. 2020.
42. Albrecht KW, de Witt Hamer PC, Leenstra S, et al. High Concentration of Daunorubicin and Daunorubicinol in Human Malignant Astrocytomas after Systemic Administration of Liposomal Daunorubicin. *Journal of Neuro-Oncology*. 2001; 53(3):267-271.
43. Zhang DY, Dmello C, Chen L, et al. Ultrasound-mediated Delivery of Paclitaxel for Glioma: A Comparative Study of Distribution, Toxicity, and Efficacy of Albumin-bound Versus Cremophor Formulations. *Clinical Cancer Research*. 2020; 26(2):477-486.
44. Zeiner, Kinzig, Divé, et al. Regorafenib CSF Penetration, Efficacy, and MRI Patterns in Recurrent Malignant Glioma Patients. *Journal of Clinical Medicine*. 2019; 8(12):2031.
45. Di K, Lloyd GK, Abraham V, et al. Marizomib activity as a single agent in malignant gliomas: ability to cross the blood-brain barrier. *Neuro-Oncology*. 2016; 18(6):840-848.
46. Feun LG, Savaraj N, Landy H, Levin H, Lampidis T. Phase II study of homoharringtonine in patients with recurrent primary malignant central nervous system tumors. 1990; 9(2):159-163.

# Figure legends

## Figure 1

**IDHmt cell cultures represent the genotype of IDHmt gliomas. (A)** Presence of glioma-associated mutations in non-neoplastic control tissue (orange bars), tumor tissue (purple bars), or cell cultures (green bars). Mutation types included are nonsynonymous SNVs (blue squares), stop gains (yellow triangles) and frameshift (red circles). **(B, C)** Median copy number log ratio plots of IDHmt tissues and cultures (N=11), and IDHwt tissues and cultures (N=5) based on global methylation data. On the X-axes chromosomes, on the Y-axes median log ratio of copy number change. Chromosomal gains and losses are more pronounced in cultures than in tissues, probably due to the presence of non-cancerous cells in tumor tissue. **(D)** Brightfield images (x10) of two cell cultures derived from a grade IV astrocytoma: fibroblast-like cell morphology of GS.0771a (p2) and astrocytoma-like cell morphology of GS.0771b (p3). **(E)** Identified mutations in IDHmt tumors GS.0771 and GS0588 and derived daughter cultures, one with astrocytoma-like and one with fibroblast-like morphology.

## Figure 2

**Global methylation profiles of IDHmt cell lines. (A)** Bar graph of subclass scores from the global methylation-based CNS tumor classifier defined by Capper et al. The origin of the DNA sample, tumor tissue (T) or cell culture (C), is indicated. The Y-axis represents the methylation class family member classifier score (positive match score  $\geq 0.5$ ). **(B)** Representation of TCGA classification of tumor tissue and cell culture samples based on seven probes associated with G-CIMP high or G-CIMP low methylation class. **(C)** Heatmap of DNA methylation profile of five IDHwt tissue samples and cell cultures and twelve IDHmt tissue samples and cell cultures, based on the 1000 most variable methylated probes. The two main clusters are formed by IDHwt versus IDHmt cell cultures and tumor tissues.

### Figure 3

**Correlation of transcriptomics of IDHmt cell cultures and parental tumor tissue. (A)** Clustering of glioma cell cultures and tumor tissues based on RNA expression through principal component analysis. Components 1 and 2 are shown. **(B)** Scatterplot showing the correlation between the log2 fold change of IDHwt versus mutant in tumor tissues (X-axis) and IDHwt versus mutant in cell cultures (Y-axis). **(C)** Gene ontology pathway analysis of significantly upregulated or downregulated pathways in IDHmt versus IDHwt cell cultures (adjusted P-value < 0.05). The size of the blue bars represents the number of DEGs in that pathway (bottom x-axis), and yellow bars represents the fold enrichment (FE) of the pathway (top x-axis). The false discovery rate values are shown on the right side of the graph.

### Figure 4

**Live cell metabolic analysis of IDHmt glioma cultures. (A)** Mean OCR values of IDHmt cultures (blue, N=6) and IDHwt cultures (grey, N=7). **(B)** Mean ECAR values of IDHmt cultures (blue, N=6) and IDHwt cultures (grey, N=7). Error bars represent the pooled standard deviations. Asterisks indicate significantly different mean OCR or ECAR values at the given timepoint (Independent Student's T-test, P < 0.5).

### Figure 5

**In vitro effect of IDH mutant-specific inhibitors on IDHmt glioma cultures. (A)** Percentage of D2-HG in cell cultures treated with increasing concentrations of IDH-mutant specific inhibitor AGI-5198 compared to DMSO-controls. **(B)** Mean average survival of IDH-mutant and IDH-wildtype cultures treated with increasing concentrations of BAY-1438032 or AGI-5198. Data are presented as mean percentage survival  $\pm$  SD. **(C)** Mean doubling times of IDHmt (N=6) and IDHwt (N=2) cell cultures, cultured with and without 10  $\mu$ M IDH mutant-specific inhibitor AGI-5198. Error bars represent standard deviations over three



consecutive passages. (\* $P < 0.05$ , paired T-test). **(D)** Heatmap showing unsupervised cluster analysis of eight IDHmt glioma cultures and four IDHwt cultures, cultured with and without IDH mutant-specific inhibitor AGI-5198 for seven days. Clustering was performed on 1000 most variably expressed genes. The heatmap was scaled by row.

## Figure 6

**Drug screen with anti-cancer compounds in IDHmt glioma cultures.** **(A)** Heatmap of response of 7 IDHmt glioma cultures to an FDA-approved anti-cancer drug set. Sensitive cell cultures (blue) were defined as having an  $IC_{50} < C_{max}$  plasma, while resistant cultures had  $IC_{50} > C_{max}$ . **(B)** Dose-response graphs of the anti-cancer compounds gemcitabine, paclitaxel, teniposide, daunorubicin, romidepsin, dactinomycin, regorafenib, omacetaxine and marizomib, on all twelve IDHmt cell cultures. The X-axes represent increasing concentrations of the respective compounds. Y-axes indicate the percentage cell viability compared to DMSO-treated controls. Error bars represent standard deviation of quadruplicates. **(C)**  $IC_{50}$  values were calculated based on the dose-response curves shown in fig. 7C. All values represent the concentration in  $\mu M$ . Red numbers indicate  $IC_{50} > C_{max}$  and are labelled as resistant.

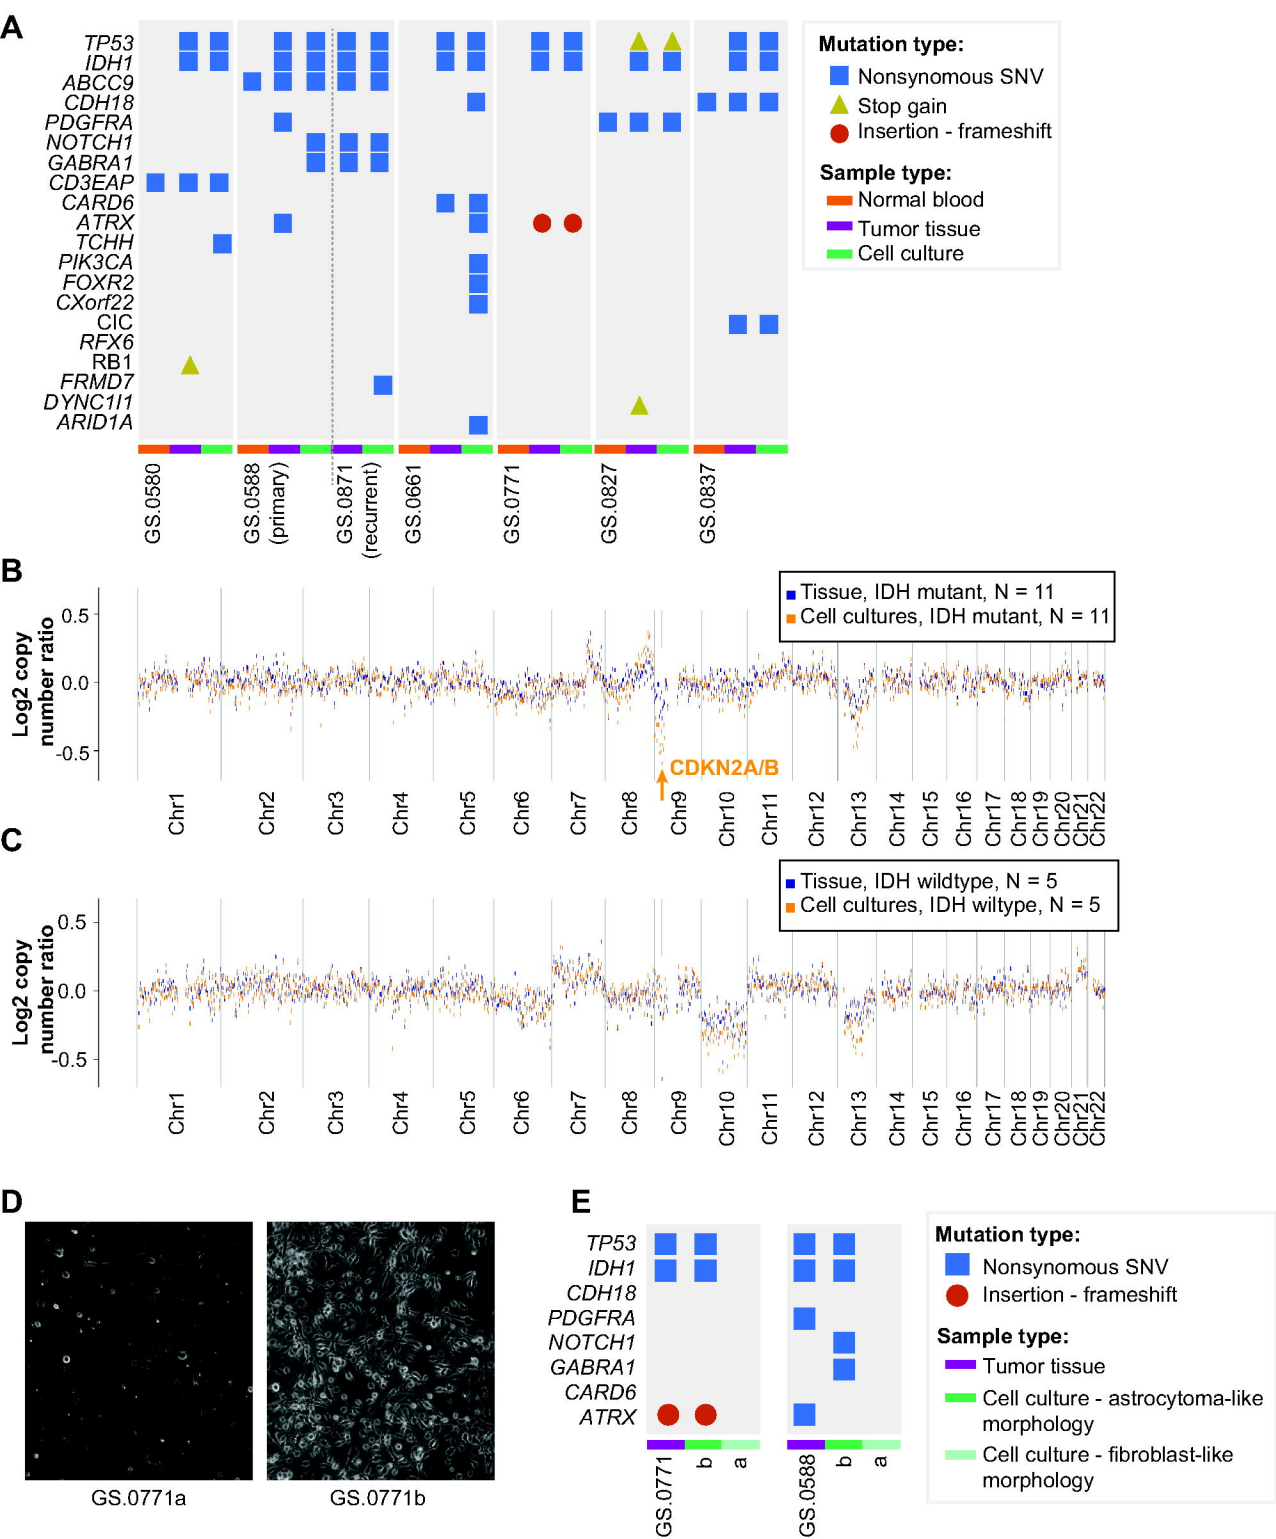

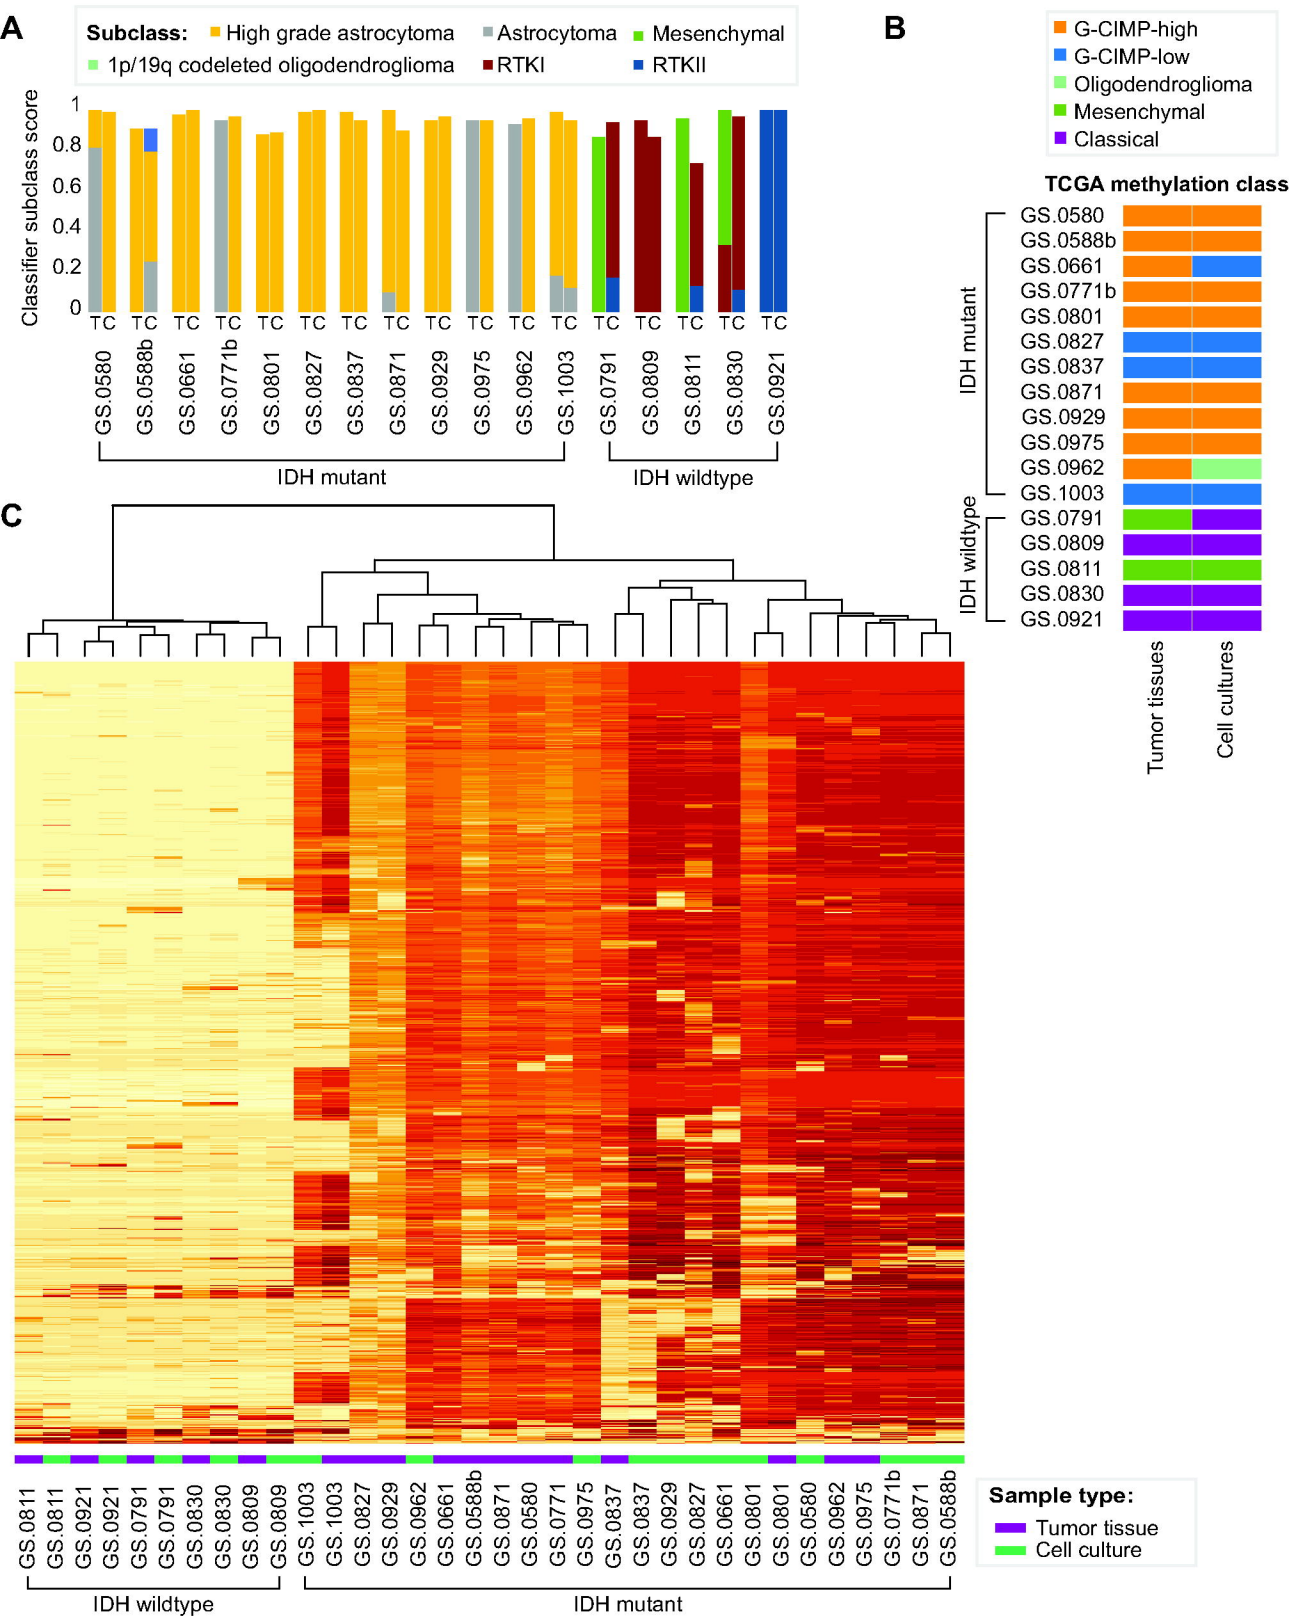

**Fig. 2 | Global methylation profiling of IDH1 mutant cell lines**

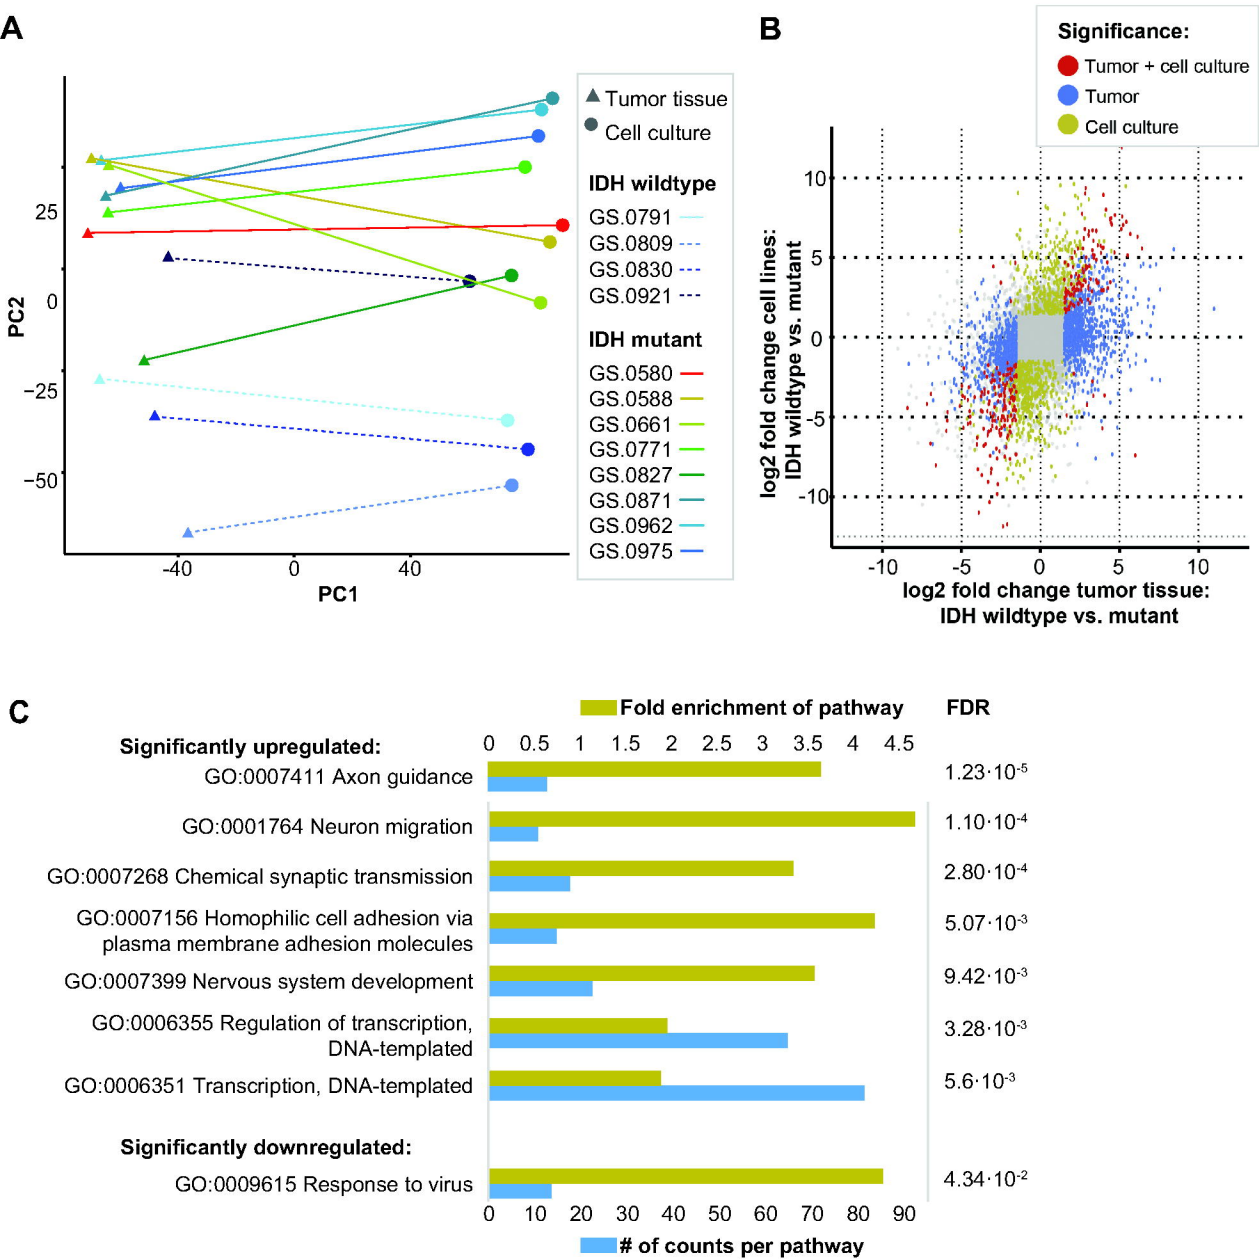

**Fig. 3 | Transcriptomics of IDH mutant cell cultures and corresponding tumor tissue**

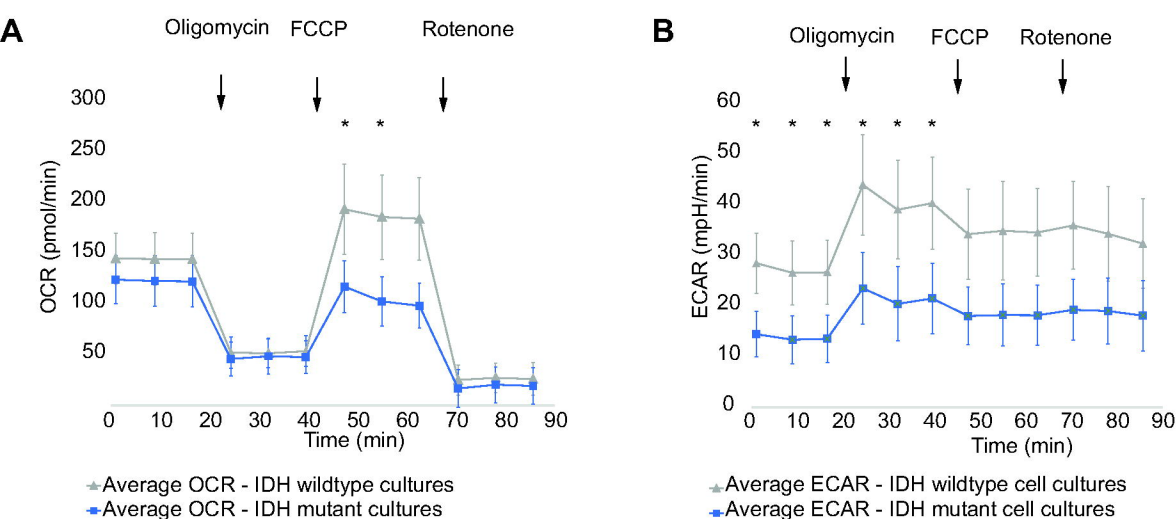

**Fig. 4 | Real time metabolic analysis**





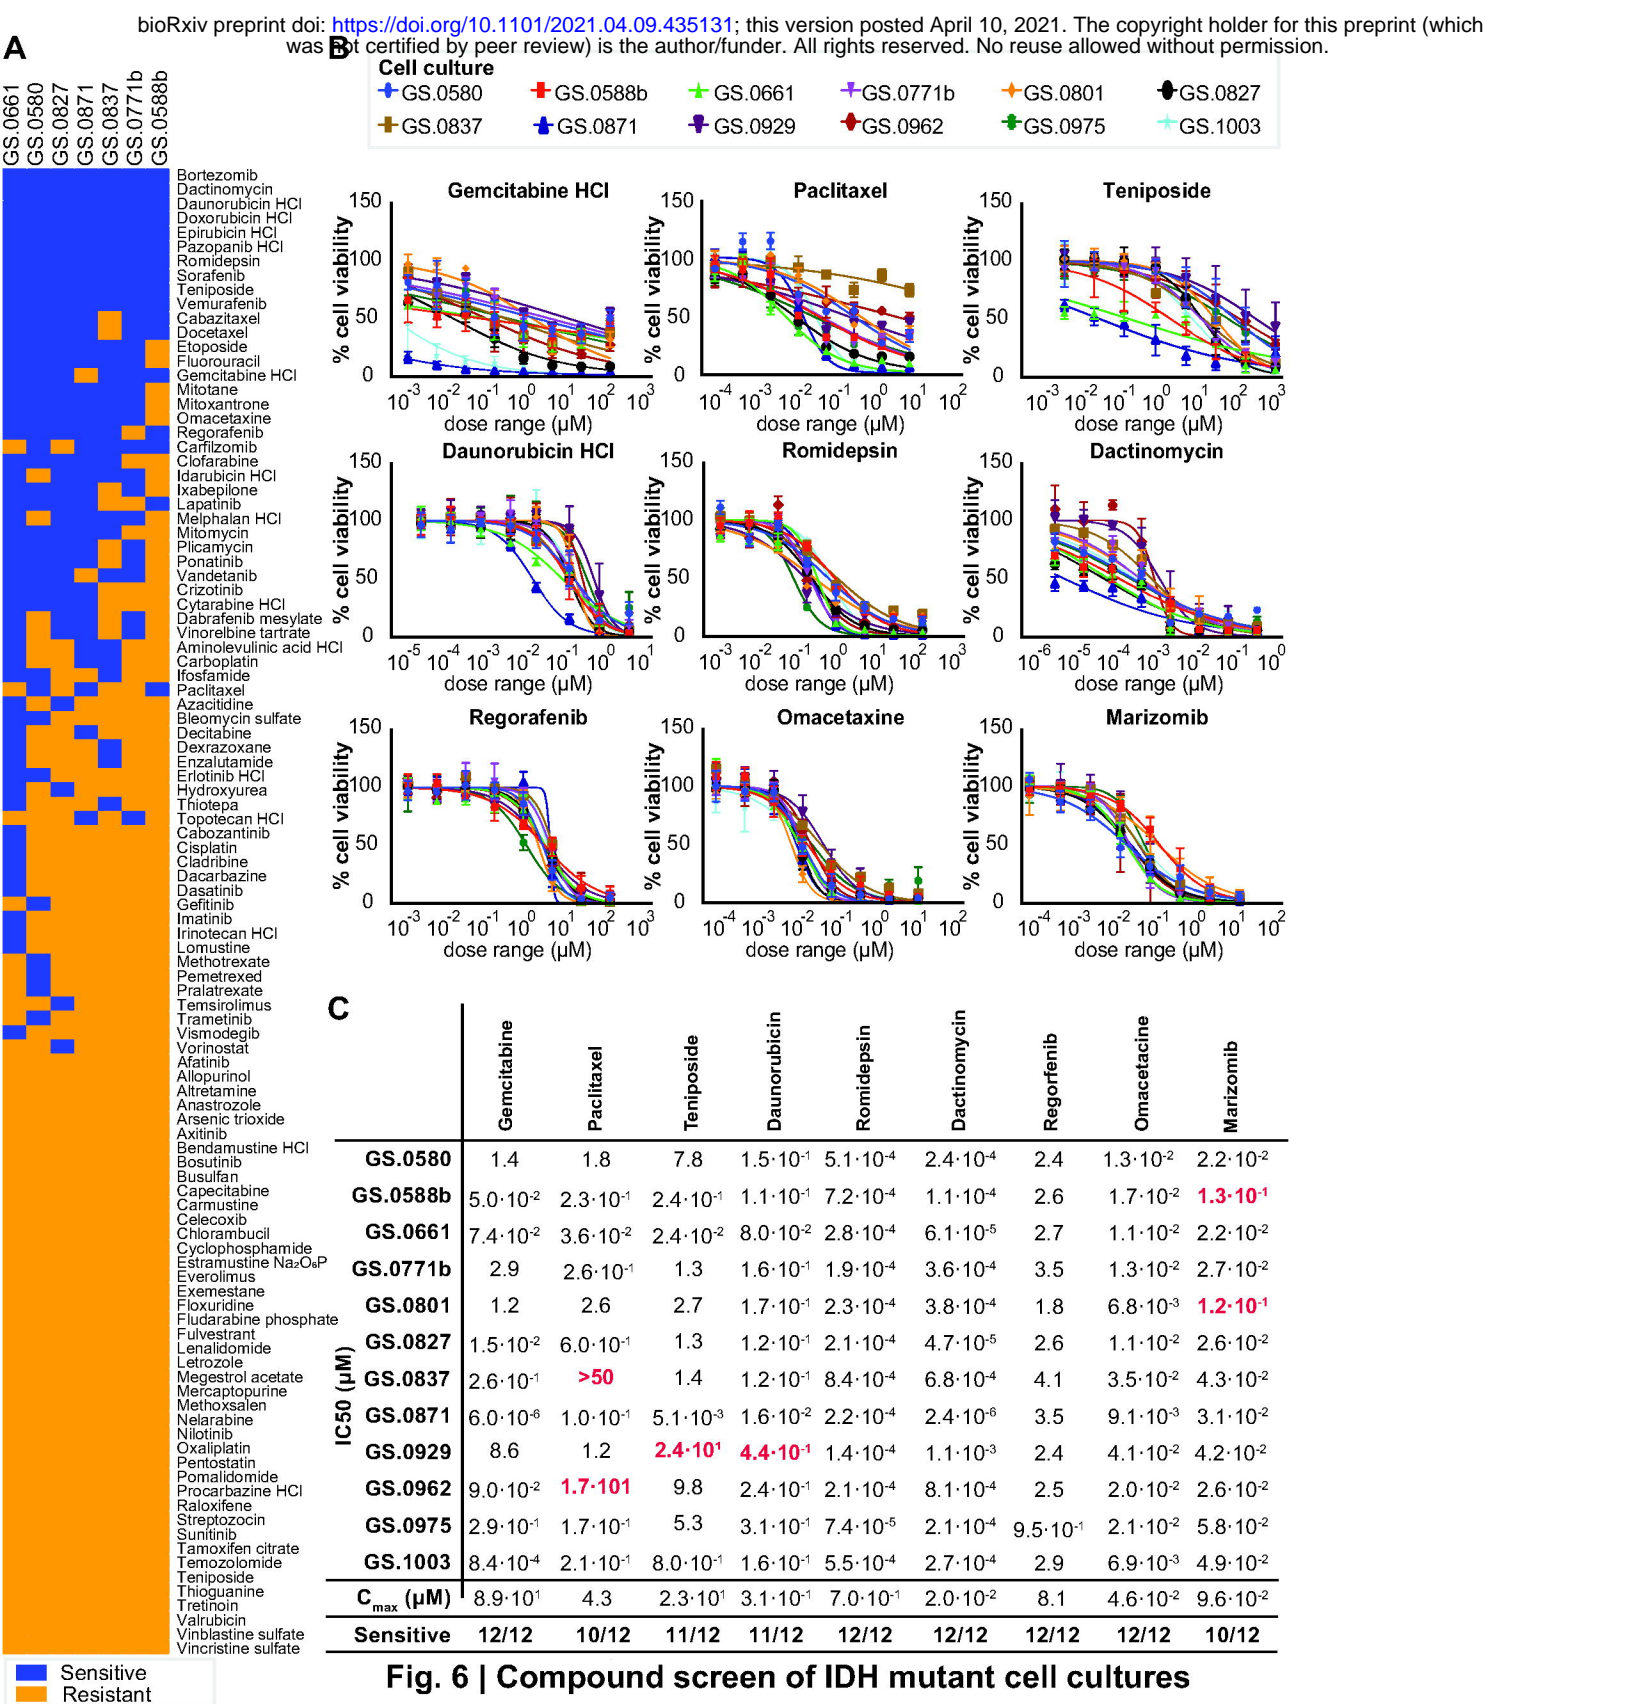

Source: http://biorxiv.org/content/10.1101/2021.04.09.435131v1.full.pdf
